# Supplementary material
Source: publisher figshare collection journal article supplement (https://tandf.figshare.com/ndownloader/files/27059259)

**Supplementary Table S1.** Mean proportion correct (and standard deviation) by group for center condition and side conditions in the Simon Picture Task.

|  | Middle SES | | High SES | |
| --- | --- | --- | --- | --- |
| Monolingual | Bilingual | Monolingual | Bilingual |
| Center | 0.97 (0.03) | 0.94 (0.08) | 0.96 (0.06) | 0.97 (0.04) |
| Side |  |  |  |  |
| Congruent | 0.97 (0.05) | 0.96 (0.04) | 0.95 (0.09) | 0.97 (0.07) |
| Incongruent | 0.94 (0.05) | 0.96 (0.05) | 0.93 (0.09) | 0.96 (0.06) |

**Supplementary Figures**

**Figure S1.** Illustration of the Simon Picture Task showing the center and side conditions. Children learned to associate each of the four images with one of two on-screen response boxes. These images then appear either in the center position or on one side of the display and children touch the screen in the box indicating the correct response. The arrows indicate the correct response for each configuration.


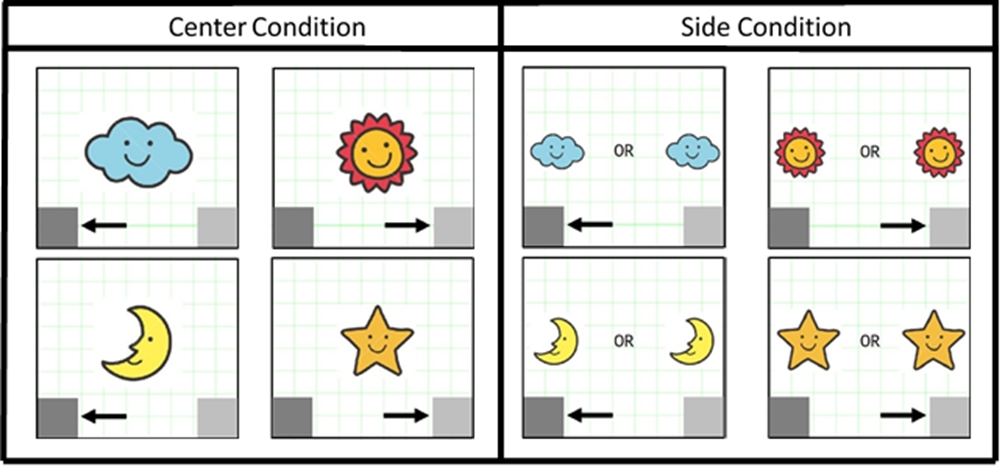

Supplement: Supplementary file 1 [file 27059259]
